# Supplementary material
Source: publisher site journal article supplement (https://www.spandidos-publications.com/4733/downloadSupplementary)

Figure S1. The mRNA expression levels of IMPA2 were analyzed in multiple types of cancer. IMPA2, inositol monophosphatase 2; TCGA, The Cancer Genome Atlas.

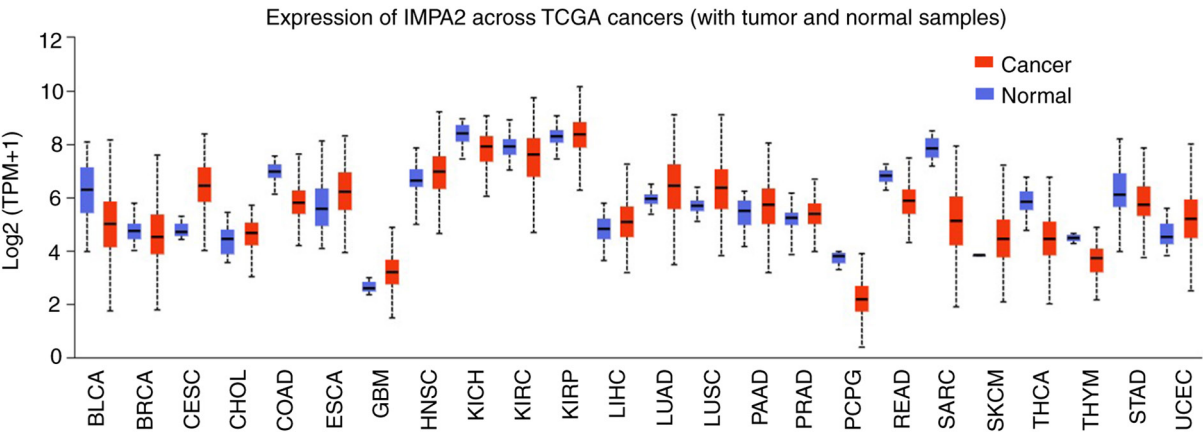

Supplement: Supplementary file 1 [file downloadSupplementary]
